# Supplementary material for: Loss of cell division cycle-associated 5 promotes cell apoptosis by activating DNA damage response in clear cell renal cell carcinoma
Source: PubMed Central journal article supplement — Int J Oncol. 2022 May 31;61(1):87. doi: 10.3892/ijo.2022.5377 (PMC9183765; doi:10.3892/ijo.2022.5377), 2022-05-31
Supplement: Supplementary_Data.pdf [file Supplementary_Data.pdf]

Table SI. Univariate and multivariate analysis of prognostic factors affecting the DFS and OS of patients with RCC.

| Parameter  | Category        | DFS                     |               |                  |                           |              |                  | OS                      |               |                  |                           |              |                  |
|------------|-----------------|-------------------------|---------------|------------------|---------------------------|--------------|------------------|-------------------------|---------------|------------------|---------------------------|--------------|------------------|
|            |                 | Cox univariate analysis |               |                  | Cox multivariate analysis |              |                  | Cox univariate analysis |               |                  | Cox multivariate analysis |              |                  |
|            |                 | HR                      | 95% CI        | P-value          | HR                        | 95% CI       | P-value          | HR                      | 95% CI        | P-value          | HR                        | 95% CI       | P-value          |
| CDCA5      | High vs. low    | 18.129                  | 6.455-50.911  | <b>&lt;0.001</b> | 4.953                     | 1.572-15.603 | <b>0.006</b>     | 20.416                  | 3.229-86.846  | <b>&lt;0.001</b> | 6.167                     | 1.276-29.810 | <b>0.024</b>     |
| Age        | >60 vs. ≤60     | 0.747                   | 0.331-1.686   | 0.482            | NA                        |              |                  | 0.448                   | 0.178-1.132   | 0.089            | NA                        |              |                  |
| Sex        | Male vs. female | 0.958                   | 0.470-1.955   | 0.907            | NA                        |              |                  | 1.832                   | 0.801-4.188   | 0.152            | NA                        |              |                  |
| BMI        | <28 vs. ≥28     | 0.642                   | 0.306-1.346   | 0.241            | NA                        |              |                  | 0.642                   | 0.233-1.673   | 0.349            | NA                        |              |                  |
| pT         | T1 vs. T2-T4    | 3.724                   | 2.002-6.928   | <b>&lt;0.001</b> | 2.569                     | 1.070-6.168  | <b>0.035</b>     | 5.445                   | 2.434-12.183  | <b>&lt;0.001</b> | NA                        |              |                  |
| pN         | N0 vs. N1       | 12.188                  | 6.048-24.561  | <b>&lt;0.001</b> | NA                        |              |                  | 6.617                   | 2.459-17.804  | <b>&lt;0.001</b> | NA                        |              |                  |
| pM         | M0 vs. M1       | 31.341                  | 16.198-60.642 | <b>&lt;0.001</b> | 7.635                     | 2.690-21.673 | <b>&lt;0.001</b> | 9.708                   | 4.341-21.710  | <b>&lt;0.001</b> | NA                        |              |                  |
| AJCC stage | I-II vs. III-IV | 35.75                   | 16.762-76.250 | <b>&lt;0.001</b> | 4.378                     | 1.395-13.741 | <b>0.011</b>     | 27.146                  | 10.114-72.862 | <b>&lt;0.001</b> | 12.265                    | 4.192-5.886  | <b>&lt;0.001</b> |
| ISUP Grade | G1-G2 vs. G3-G4 | 7.986                   | 4.222-15.106  | <b>&lt;0.001</b> | NA                        |              |                  | 10.033                  | 4.153-24.237  | <b>&lt;0.001</b> | NA                        |              |                  |

Values in bold font indicate statistical significance (P<0.05). DFS, disease free survival; OS, overall survival; HR, hazard ratio; CI, confidence interval; NA, not available.
